# Supplementary material
Source: PubMed Central journal article supplement (PMC2711804)

*Online Supplement:*

*L-00112-2009R1: ↑O<sub>2</sub> blocks type II cell proliferation via NADPH oxidase*

Sections from P11 95%O<sub>2</sub>-exposed pups from p47<sup>phox</sup><sup>-/-</sup> (A) and wild-type (B,C) detected with anti-p47<sup>phox</sup>. Labels indicate leukocytes (arrowheads), bronchioles (b), and blood vessels (v).

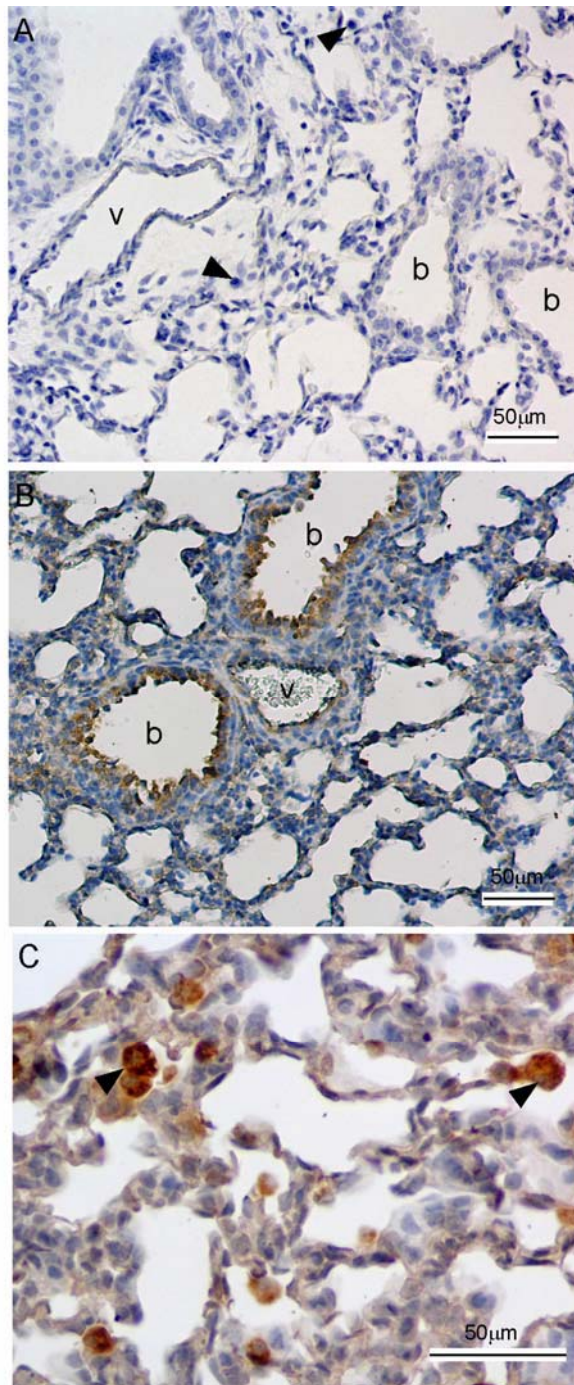

Supplement: 00112.2009_1.pdf [file 00112.2009_1.pdf]
